# Supplementary material for: The Absence of FAIM Leads to a Delay in Dark Adaptation and Hampers Arrestin-1 Translocation upon Light Reception in the Retina
Source: MDPI journal article supplement (doi:10.3390/cells12030487), 2023-02-02
Supplement: s1 [file s1]

**Supplementary Materials for:**

**The Absence of FAIM Leads to a Delay in Dark Adaptation and Hampers Arrestin-1 Translocation upon Light Reception in the Retina**

**Anna Sirés**<sup>1,2,3,†</sup>, **Mateo Pazo-González**<sup>4,5,†</sup>, **Joaquín López-Soriano**<sup>1,2,3</sup>, **Ana Méndez**<sup>6,7,8</sup>, **Enrique J. de la Rosa**<sup>4,9</sup>, **Pedro de la Villa**<sup>4,5</sup>, **Joan X. Comella**<sup>1,2,3</sup>, **Catalina Hernández-Sánchez**<sup>4,9</sup> and **Montse Solé**<sup>1,2,3,\*</sup>

- <sup>1</sup> Cell Signaling and Apoptosis Group, Vall d’Hebron Institute of Research (VHIR), 08035 Barcelona, Spain  
<sup>2</sup> Centro de Investigación Biomédica en Red sobre Enfermedades Neurodegenerativas (CIBERNED), ISCIII, 28029 Madrid, Spain  
<sup>3</sup> Departament de Bioquímica i Biologia Molecular i Institut de Neurociències, Facultat de Medicina, Universitat Autònoma de Barcelona (UAB), 08193 Bellaterra, Spain  
<sup>4</sup> Department of Molecular Biomedicine, Centro de Investigaciones Biológicas Margarita Salas (CSIC), E-28040 Madrid, Spain  
<sup>5</sup> Department of Systems Biology, Facultad de Medicina, Universidad de Alcalá, 28871 Alcalá de Henares, Spain  
<sup>6</sup> Department of Physiological Sciences, School of Medicine, Campus Universitari de Bellvitge, University of Barcelona, 08907 Barcelona, Spain; mendezzu@idibell.cat  
<sup>7</sup> Institut de Neurociències, Campus Universitari de Bellvitge, University of Barcelona, 08907 Barcelona, Spain  
<sup>8</sup> Institut d’Investigació Biomèdica de Bellvitge (IDIBELL), Campus Universitari de Bellvitge, University of Barcelona, 08907 Barcelona, Spain  
<sup>9</sup> Centro de Investigación Biomédica en Red de Diabetes y Enfermedades Metabólicas Asociadas (CIBERDEM), ISCIII, 28029 Madrid, Spain  
\* Correspondence: montserrat.sole@uab.cat  
† These authors contributed equally to this work.

**Table S1.** Table of primary antibodies for immunofluorescence detection.

| <i>Antibody</i>        | <i>Supplier information</i>                                     | <i>Immunogen</i>                                                             | <i>Dilution</i> |
|------------------------|-----------------------------------------------------------------|------------------------------------------------------------------------------|-----------------|
| <i>Multi-ubiquitin</i> | Santa Cruz Biotechnology mouse monoclonal antibody Cat# sc-8017 | UBB human, mouse, rat                                                        | 1:2,000         |
| <i>GFAP</i>            | Abcam rabbit polyclonal Cat #ab7260                             | Full-length human recombinant GFAP expressed in bacteria and highly purified | 1:2,000         |
| <i>Arrestin-1</i>      | Rabbit polyclonal antibody provided by Dr. Ana Méndez           | C10C10 epitope (residues 290-297 of bovine arrestin)                         | 1:1,000         |
| <i>Transducin-α</i>    | Rabbit polyclonal antibody, provided by Dr. Ana Méndez          | Residues 85–103                                                              | 1:2,000         |

**Table S2.** Table of secondary antibodies for immunofluorescence detection.

| <i>Antibody</i>                                                 | <i>Supplier information</i>                     | <i>Immunogen</i> |     | <i>Dilution</i> |
|-----------------------------------------------------------------|-------------------------------------------------|------------------|-----|-----------------|
| Goat Anti-Rabbit IgG (H+L) Antibody, Alexa Fluor 488 Conjugated | Molecular Probes rabbit polyclonal Cat# A-11008 | Rabbit (H+L)     | IgG | 1:600           |
| Goat Anti-Rabbit IgG (H+L) Antibody, Alexa Fluor 594 Conjugated | Molecular Probes rabbit Cat# A-11012            | Rabbit (H+L)     | IgG | 1:600           |

**Table S3.** Table of primary antibodies for western blot.

| <i>Antibody</i>         | <i>Supplier information</i>                            |                 | <i>Immunogen</i>                                                                                           | <i>MW (kDa)</i> | <i>Dilution</i> |
|-------------------------|--------------------------------------------------------|-----------------|------------------------------------------------------------------------------------------------------------|-----------------|-----------------|
| Anti-FAIM               | In-house polyclonal [5]                                | rabbit antibody | Recombinant protein corresponding to full-length rat FAIM                                                  | 21, 23          | 1:2,000         |
| Arrestin-1              | Rabbit polyclonal antibody provided by Dr. Ana Méndez  |                 | C10C10 epitope (residues 290-297 of bovine arrestin)                                                       | 48              | 1:10,000        |
| Transducin- $\alpha$    | Rabbit polyclonal antibody, provided by Dr. Ana Méndez |                 | Residues 85–103 of transducin- $\alpha$                                                                    | 40              | 1:5,000         |
| Anti- $\alpha$ -tubulin | Sigma-Aldrich monoclonal Cat# T5168                    | mouse antibody  | B612 clone hybridoma produced by the fusion of mouse myeloma cells and splenocytes from an immunized mouse | 50              | 1:60,000        |

**Table S4.** Table of secondary antibodies for western blot.

| <i>Antibody</i>       | <i>Supplier information</i>                         | <i>Immunogen</i> |        | <i>Dilution</i> |
|-----------------------|-----------------------------------------------------|------------------|--------|-----------------|
| Goat anti-Rabbit IgG  | Sigma-Aldrich goat Cat# A0545                       | Purified IgG     | rabbit | 1:20,000        |
| Rabbit anti-mouse IgG | Sigma-Aldrich rabbit polyclonal antibody Cat# A9044 | Purified IgG     | mouse  | 1:20,000        |

**Figure S1.**

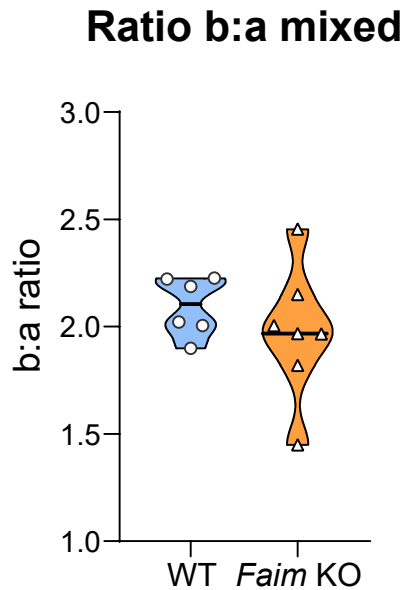

**Figure S1. b:a ratio is normal in Faim KO mice at 18 months.** Ratio of mixed b-and a-wave at 1.5 log cd·s/m<sup>2</sup>. Data are represented as violin plots. Each dot corresponds to a retina, the median is represented by a thick dashed line, and quartiles are represented by thin dotted lines Student's t test statistics,  $p = 0.3949$ .

**Figure S2.**

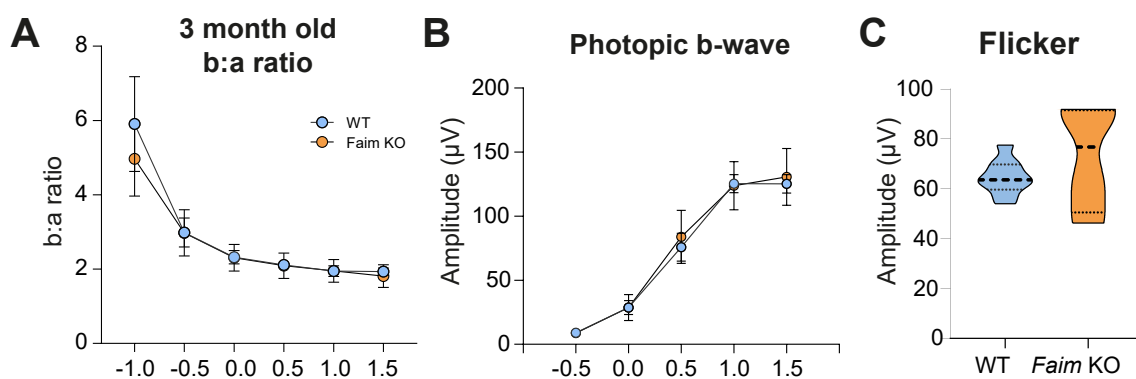

**Figure S2. ERG data of WT and Faim KO mice at 3 months of age (A)** Mixed b:a ratio is normal in Faim KO mice at 3 months of age at 1.5 log cd·s/m<sup>2</sup>. **(B)** Amplitudes of ERG recordings in photopic conditions under different light intensities. **(C)** Flicker ERG amplitude at 20 Hz. Data are represented as XY graphs and violin plots.

**Figure S3.**

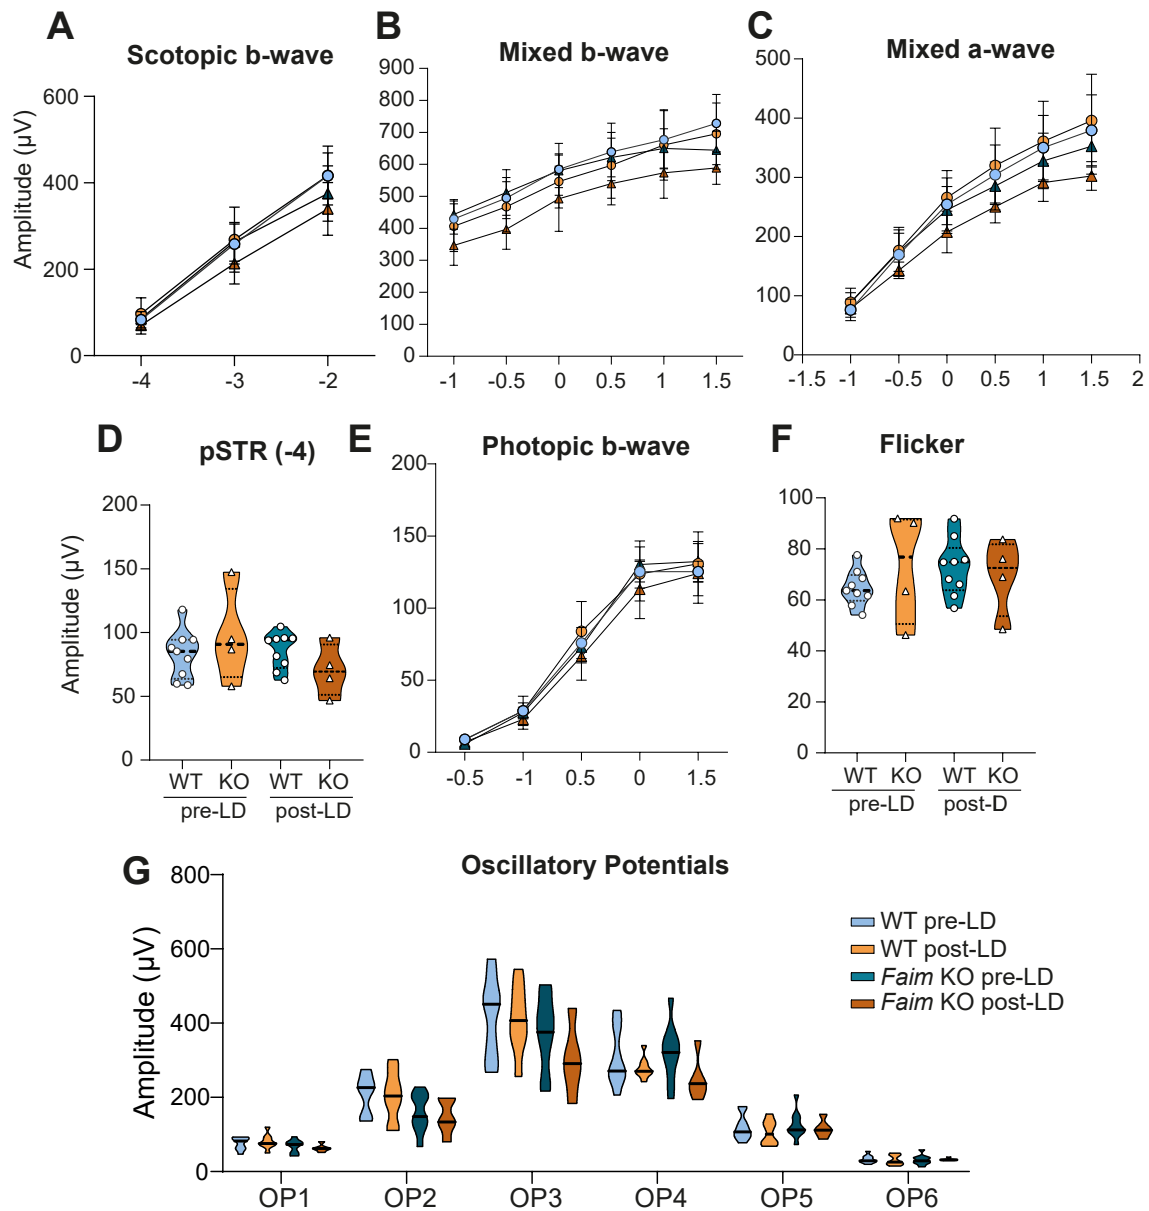

**Figure S3. No changes were found in ERG analysis in 2-month-old *Faim* KO mice after light damage.** ERG was performed at the indicated light intensities, corresponding to scotopic (A), mixed (B, C) and photopic (E) conditions. pSTR was performed at  $-4 \log \text{cd}\cdot\text{s}/\text{m}^2$  (D), and flicker recordings at 20 Hz (F). Oscillatory potential amplitudes are represented in (G). At least 4 animals were analysed per each group. Data are represented as XY graphs or violin plots. In violin plots, each animal is represented as a dot. Each violin plot extends from the min to max values, the median is represented by a thick dashed line, and quartiles are represented by thin dotted lines. Statistical analysis was performed using repeated measures three-way ANOVA, in which genotype, light intensity and light damage were used as factors. \*  $p < 0.05$ .
